# Supplementary material
Source: HighWire-hosted journal article supplement (https://www.annfammed.org/highwire/filestream/8176/field_highwire_adjunct_files/0/Solberg_Suppl_Tables_1-2.pdf)
Supplement: Solberg_Suppl_Tables_1-2.pdf [file Solberg_Suppl_Tables_1-2.pdf]

**Online Supplementary Material**

Solberg LI, Asche SE, Fontaine P, Flottemesch TJ, Anderson LH. Trends in quality during medical home transformation. *Ann Fam Med.* 2011;9(6):515-521.

<http://www.annfammed.org/content/9/6/515>

| Question                                                       | 2005                   |           | 2009                   |           |
|----------------------------------------------------------------|------------------------|-----------|------------------------|-----------|
|                                                                | Mean (SD) <sup>a</sup> | Range     | Mean (SD) <sup>a</sup> | Range     |
| Very satisfied with clinic                                     | 55.3 (5.6)             | 43.1-65.3 | 57.0 (5.9)             | 44.6-65.0 |
| Would definitely recommend clinic                              | 64.4 (5.4)             | 54.1-73.1 | 66.7 (6.0)             | 49.7-76.4 |
| Very satisfied with ability to get medical advice after hours  | 28.1 (5.5)             | 17.5-35.3 | 29.3 (5.1)             | 21.5-39.3 |
| Very satisfied with ability to schedule convenient appointment | 45.5 (7.4)             | 31.7-58.2 | 45.5 (6.8)             | 32.9-56.3 |
| Very satisfied with ease of seeing doctor of your choice       | 47.5 (5.1)             | 36.2-55.8 | 48.6 (6.9)             | 37.3-60.3 |
| Very satisfied with how well listened to                       | 58.5 (3.9)             | 49.3-66.4 | 59.2 (5.5)             | 49.7-70.9 |
| Very satisfied with advice on how to stay healthy              | 47.0 (4.5)             | 37.4-56.3 | 46.8 (5.1)             | 37.9-58.1 |

HPMG = HealthPartners Medical Group.  
<sup>a</sup> Unadjusted percentages of patients.

**Online Supplementary Material**

Solberg LI, Asche SE, Fontaine P, Flottemesch TJ, Anderson LH. Trends in quality during medical home transformation. *Ann Fam Med.* 2011;9(6):515-521.

<http://www.annfammed.org/content/9/6/515>

| <b>Measure<sup>a</sup></b>    | <b>No. of Medical Groups</b> | <b>Baseline</b>              |              | <b>Last Year</b>             |              |
|-------------------------------|------------------------------|------------------------------|--------------|------------------------------|--------------|
|                               |                              | <b>Mean (SD)<sup>a</sup></b> | <b>Range</b> | <b>Mean (SD)<sup>a</sup></b> | <b>Range</b> |
| Optimal diabetes care         | 19                           | 14.6 (5.0)                   | 3.3-22.7     | 18.6 (6.9)                   | 9.7-34.2     |
| Optimal CAD care              | 19                           | 34.3 (6.9)                   | 24.3-47.9    | 37.2 (7.6)                   | 24.0-49.3    |
| Composite preventive services | 21                           | 72.6 (6.5)                   | 62.7-83.1    | 77.1 (5.7)                   | 63.0-90.1    |
| Generic drug use              | 34                           | 31.7 (3.3)                   | 25.0- 38.4   | 46.9 (3.6)                   | 39.7-55.7    |

CAD = coronary artery disease; HPMG = HealthPartners Medical Group.  
 Note: Number of non-HPMG medical groups was 19 for optimal diabetes care and optimal CAD care, 21 for composite preventive services, 34 for generic drug use.  
<sup>a</sup> Quality measures assessed in 2005-2007 (optimal diabetes care and optimal CAD care), 2006-2009 (composite preventive services), and 2005-2009 (generic drug use).
